# Supplementary material for: Poly(HPMA)–chlorambucil conjugate nanoparticles: facile fabrication and in vitro anti-cancer activity
Source: Royal Society of Chemistry journal article supplement (doi:10.1039/d1nj03134a), 2021-01-01
Supplement: d1nj03134a1.pdf [file d1nj03134a1.pdf]

**Poly(HPMA)-chlorambucil conjugate nanoparticle: facilely  
fabrication, acidic responsive release and in vitro anti-cancer activity**

Guichen Li<sup>a</sup>, Minzhi Zhao<sup>a</sup>, Jia Zhang<sup>a</sup>, Haining Li<sup>b</sup>, Weibing Xu<sup>\*a</sup>,

Lumei Pu<sup>a</sup>, Xinhe Shi<sup>\*c</sup>

<sup>a</sup> *College of Science, Gansu Agricultural University, Lanzhou 730000, China.*

<sup>b</sup> *Gansu Provincial Cancer Hospital, Lanzhou, 730050, P.R. China*

<sup>c</sup> *Laboratory Animal Centre, The Second Hospital of Lanzhou University, Lanzhou  
730000, China*

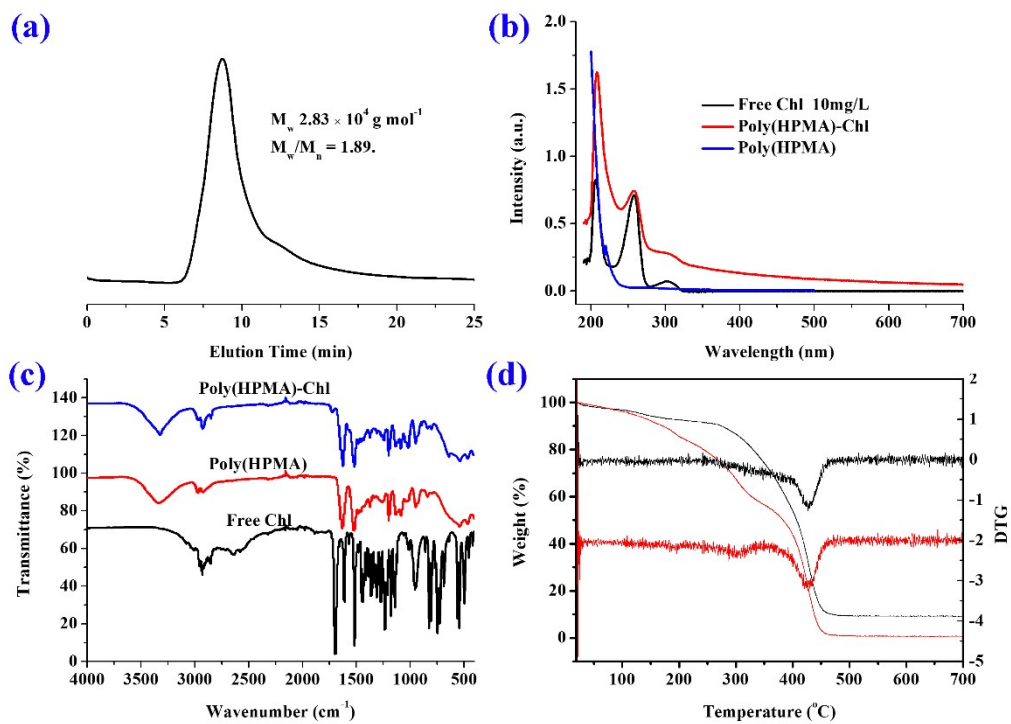

Fig. S1 (a) SEC curve of the Poly(HPMA)-Chl conjugate, UV-Vis (b), IR spectrum (c) and TGA curves of free Chl, Poly(HPMA) and Poly(HPMA)-Chl conjugate.

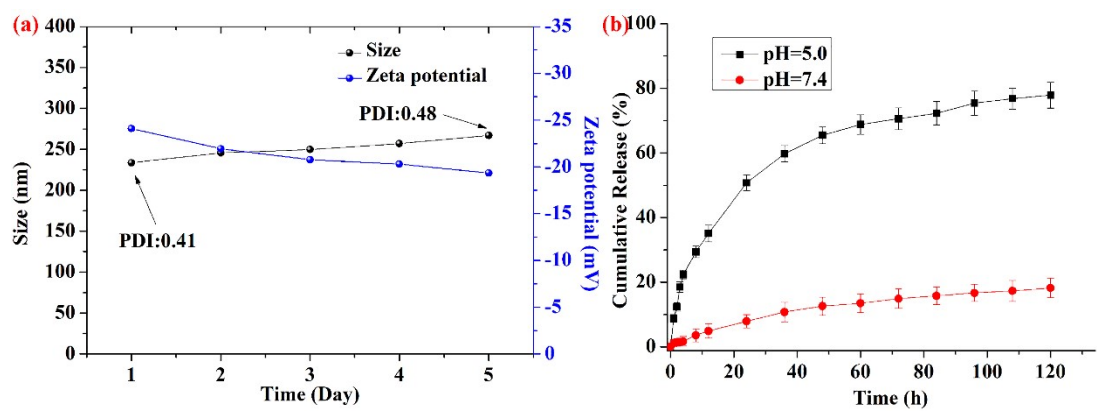

Fig. S2 (a)DLS and Zeta potential of the Poly(HPMA)-Chl conjugate for a period of five days, (b) In vitro Chl release of poly(HPMA)-Chl conjugate in PBS with different pH.

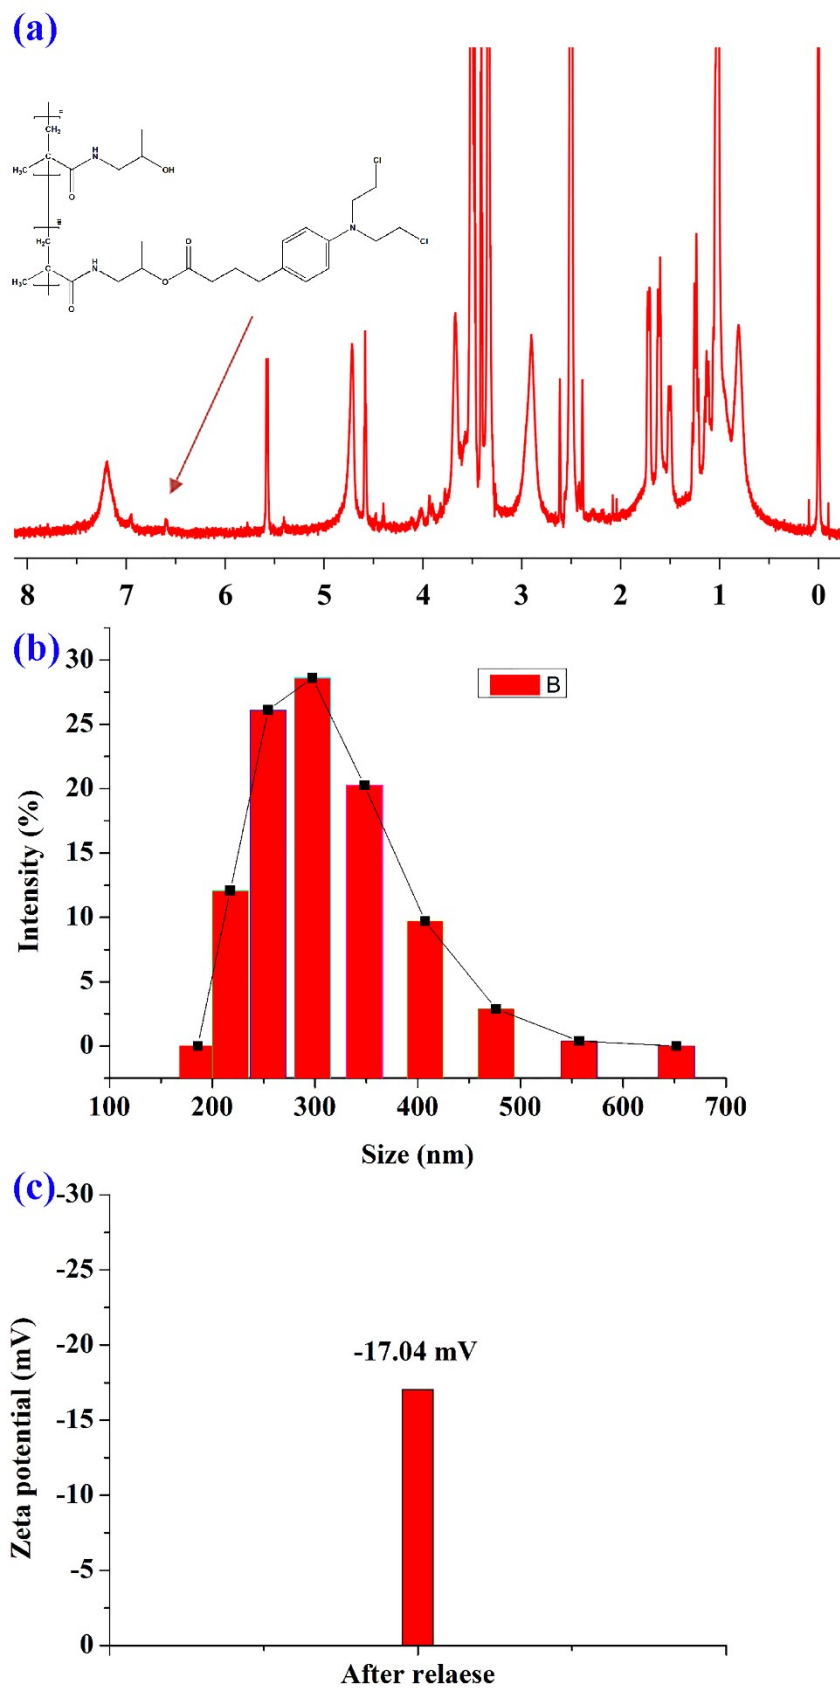

Fig. S3 (a) the  $^1\text{H}$  NMR spectrum, (b) DLS and (c) Zeta potential of the residue product after release of Chl.

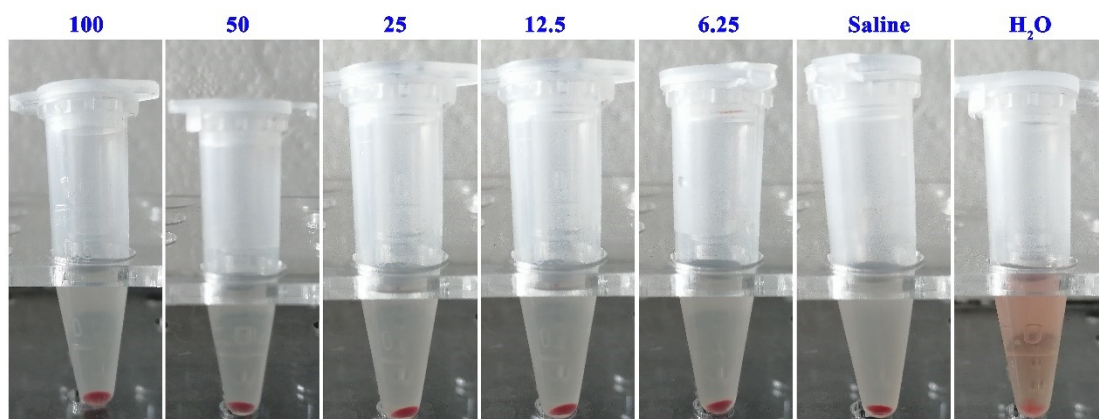

Fig. S4 Erythrocyte hemolysis resulted of Poly(HPMA)-Chl conjugate.

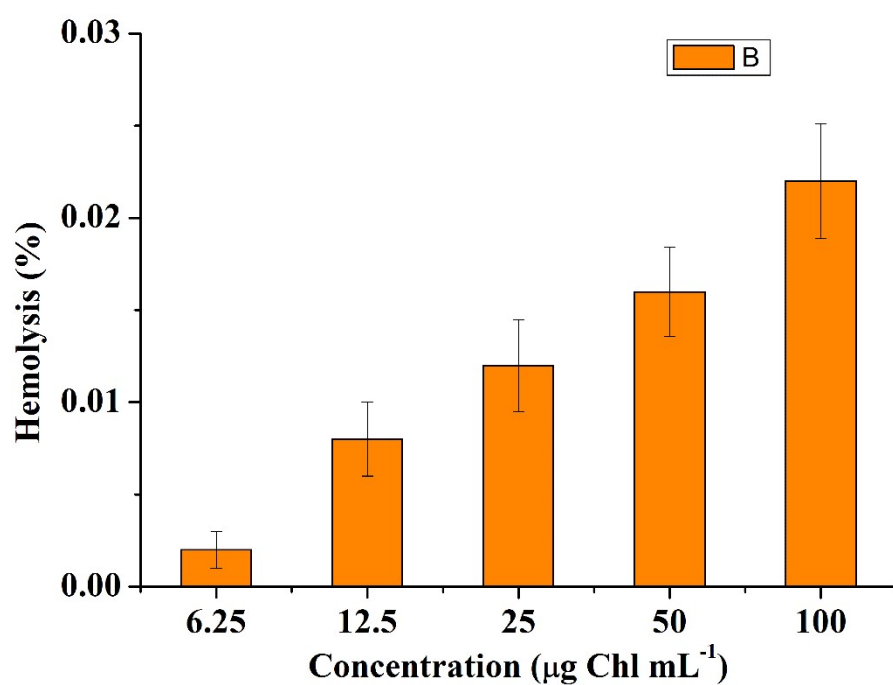

Fig. S5 Hemolysis of the Poly(HPMA)-Chl towards RBCs

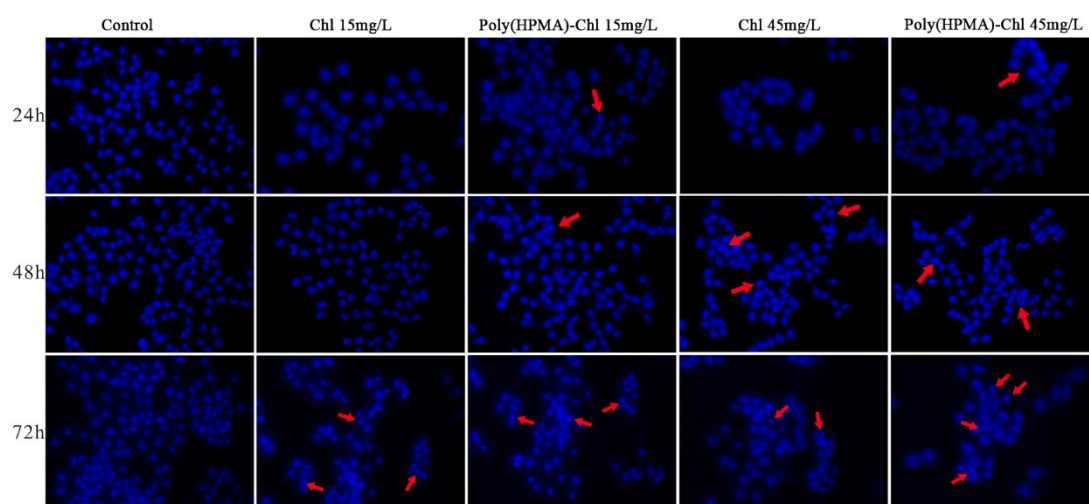

Fig. S6 Fluorescence images of HepG-2 cells incubated with different concentration free Chl and Poly(HPMA)-Chl for 24, 48 and 72 h.

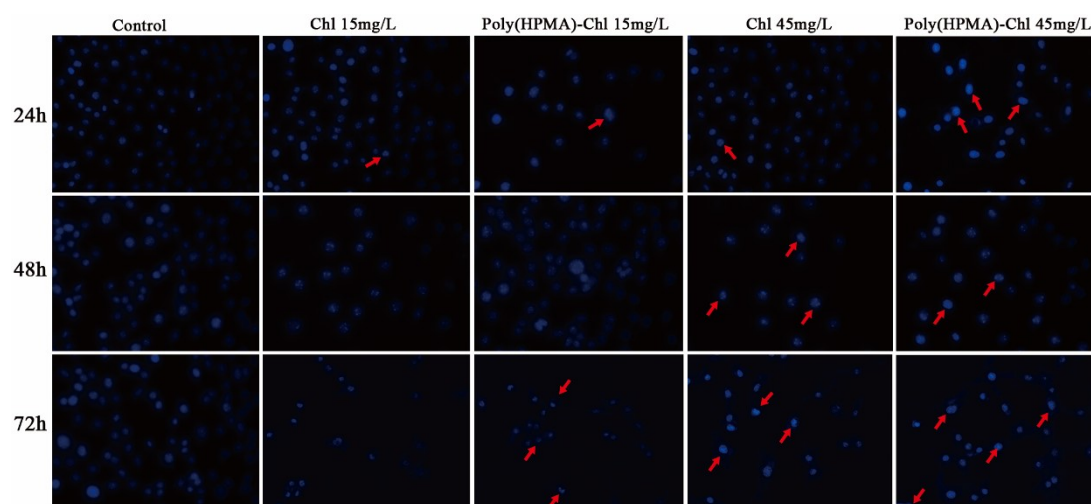

Fig. S7 Fluorescence images of MCF-7 cells incubated with different concentration free Chl and Poly(HPMA)-Chl for 24, 48 and 72 h.

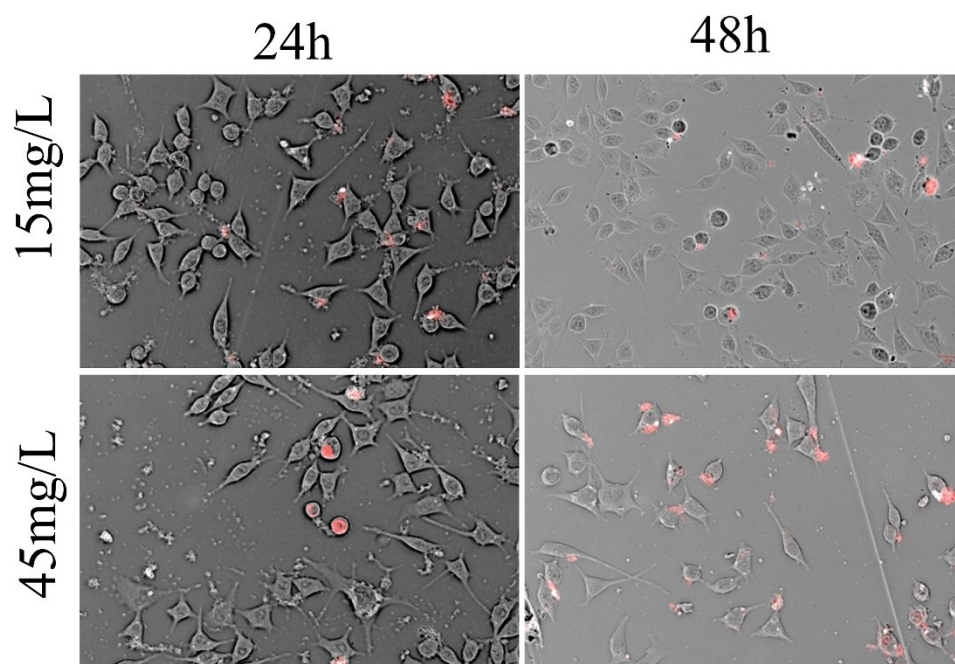

Fig. S8 the cellular uptake of the RhB labelled poly(HPMA)-Chl.



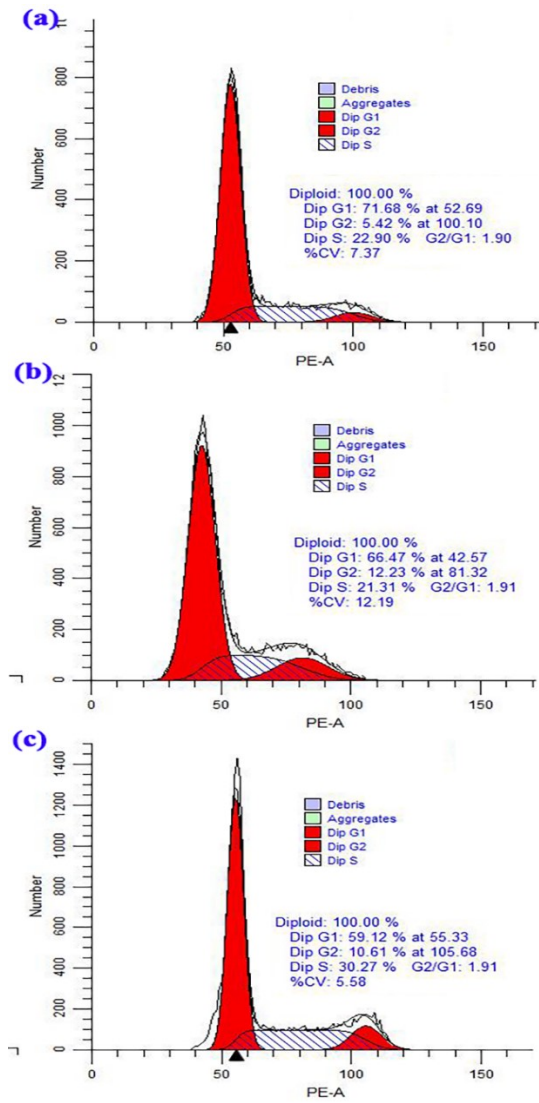

Fig. S9 The cycle data of MCF-7 cells incubated with Poly(HPMA)-Chl conjugate at different concentration (a) control, (b) 15 mg/L and (c) 45 mg/L for 48 h.

Table S1 The comparisons of the cell cycle

|                                                       | Sub-G1 | G0/G1  | S      | G2/M   | Refs      |
|-------------------------------------------------------|--------|--------|--------|--------|-----------|
| PPAHC( $C_{\text{CHL}} = 60 \mu\text{g/mL}$ )         | 35.7%  | 35.5%  | 20.1%  | 12.2%  | 1         |
| Platinum(IV)-chlorambucil complex (20 $\mu\text{M}$ ) | -      | 28.05% | 33.10% | 38.85% | 2         |
| Chlorambucil Gemcitabine Conjugate(10 $\mu\text{M}$ ) |        | 47.8%  | 29.5%  | 22.7%  | 3         |
| Mito-Chlor (2 $\mu\text{M}$ )                         |        | 30%    | 10%    | 60%    | 4         |
| ImImIm-(S) Chlg-PyPyPyPy-bDp                          | 7%     | 48%    | 20%    | 24%    | 5         |
| Poly(HPMA)-Chl 45mgChl/L                              | -      | 59.12% | 30.27% | 10.61% | This work |

1.C. Q. Luo, Y. X. Zhou, T. J. Zhou, L. Xing, P. F. Cui, M. Sun, L. Jin, N. Lu, H. L. Jiang, *J Controlled Release.*, 2018, **274**, 56-68.

2.X. Qing, L. Fang, F. Chen, S. Gou, *Eur J Med Chem.*, 2017, **137**, 167-175.

3.M. Fang, X. Liang, Z. li, H. Wang, D. Yang, B. Shi, *EUR J Pharm SCI.*, 2015, **79**, 20-26.

4.M. Millard, J. D. Gallagher, B. Z. Olenyuk, N. Neamati, *J. Med. Chem.*, 2013, **56**, 9170–9179.

5.S. M. Tsai, M. E. Farkas, C. C. James, J. M. Gottesfeld, P. B. Dervan, *Nucleic Acids Res.*, 2007, **35**, 307-316.
